# Supplementary material for: MOF Derived Manganese Oxides Nanospheres Embedded in N-Doped Carbon for Oxygen Reduction Reaction
Source: MDPI journal article supplement (doi:10.3390/inorganics10090126), 2022-08-28
Supplement: s1 [file s1]

Archive with 1 entries (1 files):
- inorganics-1824646-supplementary.pdf
