# Supplementary material for: MOF Derived Manganese Oxides Nanospheres Embedded in N-Doped Carbon for Oxygen Reduction Reaction
Source: MDPI journal article supplement (doi:10.3390/inorganics10090126), 2022-08-28
Supplement: s1 [file s1 › inorganics-1824646-supplementary.pdf]

## Supporting Information

### MOF Derived Manganese Oxides Nanospheres Embedded in N-Doped Carbon for Oxygen Reduction Reaction

Zhibin Zhang, Ge Huo, Fengzhan Si, Xian-Zhu Fu, Shao-Qing Liu \* and Jing-Li Luo \*

#### Synthesis of ZIF-8

0.4175 g  $\text{Zn}(\text{NO}_3)_2 \cdot 6\text{H}_2\text{O}$  and 0.925 g 2-methylimidazole were dissolved in 20ml methanol, respectively, and the two solutions were mixed and stirred for 2 h. Then it was cleaned three times with methanol and placed in a vacuum drying oven at 40 °C for 12 h.

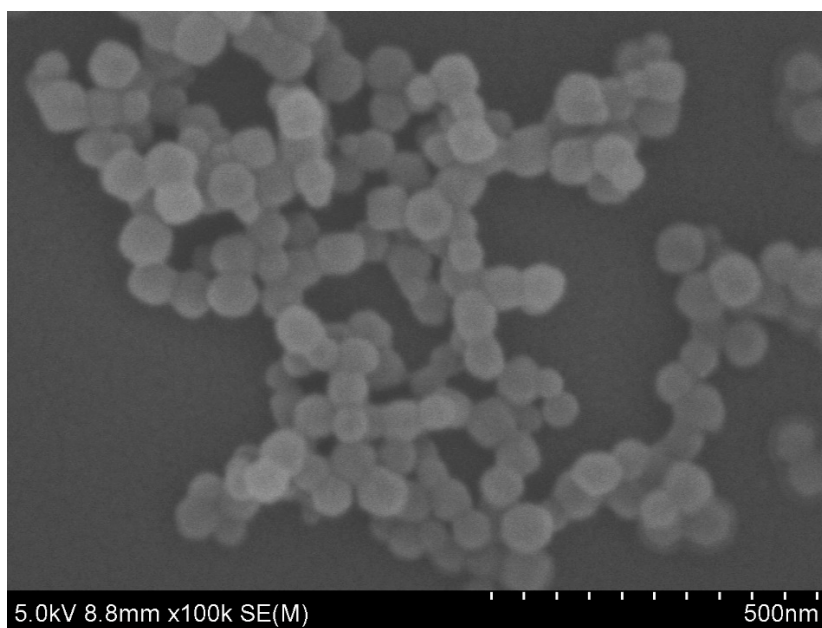

**Figure S1.** SEM of ZIF-8.

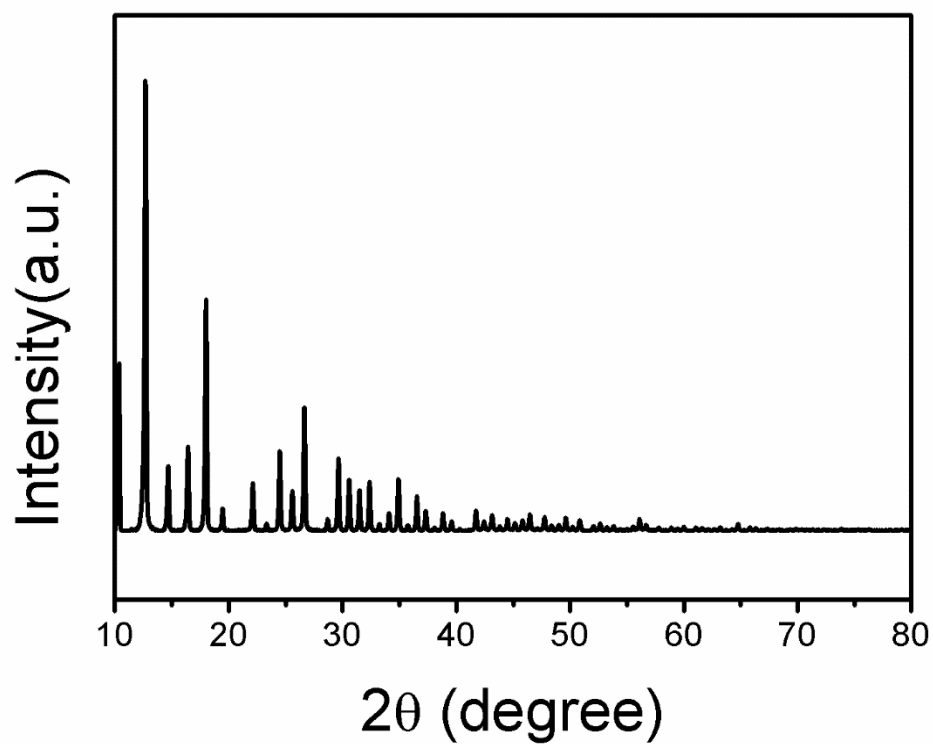

Figure S2. XRD of ZIF.

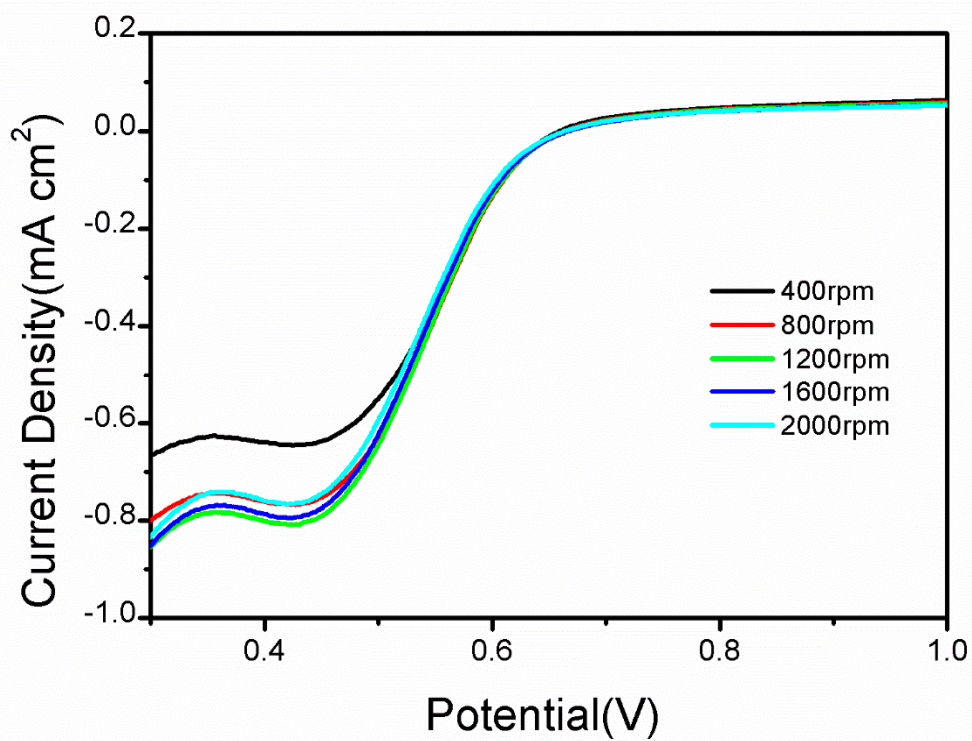

Figure S3. Linear sweeping voltammograms of ORR on the GCE without catalyst ink.
